# Supplementary material
Source: PubMed Central journal article supplement (PMC3065367)
Supplement: NIHMS240215-supplement-01.pdf [file NIHMS240215-supplement-01.pdf]

# Supplementary Data

## Kinetic Snapshots of Human DNA Polymerases $\lambda$ and $\beta$ during Gap-Filling DNA Synthesis

Jessica A. Brown, Lindsey R. Pack, Laura E. Sanman, and Zucui Suo

**Supplementary Table 1.** Kinetic parameters for nucleotide incorporation into gapped or recessed DNA catalyzed by dPol  $\lambda$  at 37 °C.

| dNTP                                   | $k_p$ (s <sup>-1</sup> ) | $K_d$ ( $\mu$ M) | $k_p/K_d$ ( $\mu$ M <sup>-1</sup> s <sup>-1</sup> ) | Efficiency ratio <sup>a</sup> | Fidelity <sup>b</sup>  |
|----------------------------------------|--------------------------|------------------|-----------------------------------------------------|-------------------------------|------------------------|
| <i>21-19/41mer (1-nucleotide gap)</i>  |                          |                  |                                                     |                               |                        |
| dGTP                                   | 3.1 ± 0.1                | 1.7 ± 0.2        | 1.8                                                 | -                             |                        |
| dCTP                                   | 0.00135 ± 0.00007        | 1.9 ± 0.4        | 7.1 × 10 <sup>-4</sup>                              | -                             | 3.9 × 10 <sup>-4</sup> |
| dATP                                   | 0.00066 ± 0.00007        | 1.8 ± 0.7        | 3.7 × 10 <sup>-4</sup>                              | -                             | 2.0 × 10 <sup>-4</sup> |
| dTTP                                   | 0.00130 ± 0.00009        | 7 ± 1            | 1.9 × 10 <sup>-4</sup>                              | -                             | 1.0 × 10 <sup>-4</sup> |
| <i>21-19/42mer (2-nucleotide gap)</i>  |                          |                  |                                                     |                               |                        |
| dGTP                                   | 2.80 ± 0.05              | 1.24 ± 0.09      | 2.3                                                 | 1                             |                        |
| dCTP                                   | 0.0208 ± 0.0005          | 0.85 ± 0.09      | 2.4 × 10 <sup>-2</sup>                              | 34 ↑                          | 1.1 × 10 <sup>-2</sup> |
| dATP                                   | 0.00031 ± 0.00002        | 3.0 ± 0.6        | 1.0 × 10 <sup>-4</sup>                              | 4 ↓                           | 4.6 × 10 <sup>-5</sup> |
| dTTP                                   | 0.00070 ± 0.00004        | 4.6 ± 0.7        | 1.5 × 10 <sup>-4</sup>                              | 1                             | 6.7 × 10 <sup>-5</sup> |
| <i>21-19/45mer (5-nucleotide gap)</i>  |                          |                  |                                                     |                               |                        |
| dGTP                                   | 3.83 ± 0.06              | 1.57 ± 0.09      | 2.4                                                 | 1                             |                        |
| dCTP                                   | 0.0060 ± 0.0003          | 1.5 ± 0.2        | 4.0 × 10 <sup>-3</sup>                              | 6 ↑                           | 1.6 × 10 <sup>-3</sup> |
| dATP                                   | 0.00042 ± 0.00003        | 3.3 ± 0.6        | 1.3 × 10 <sup>-4</sup>                              | 3 ↓                           | 5.2 × 10 <sup>-5</sup> |
| dTTP                                   | 0.00154 ± 0.00009        | 7 ± 1            | 2.2 × 10 <sup>-4</sup>                              | 1                             | 9.0 × 10 <sup>-5</sup> |
| <i>21-19/47mer (7-nucleotide gap)</i>  |                          |                  |                                                     |                               |                        |
| dGTP                                   | 2.62 ± 0.05              | 1.28 ± 0.09      | 2.0                                                 | 1                             |                        |
| dCTP                                   | 0.0072 ± 0.0002          | 0.77 ± 0.07      | 9.4 × 10 <sup>-3</sup>                              | 13 ↑                          | 4.5 × 10 <sup>-3</sup> |
| dATP                                   | 0.000102 ± 0.000008      | 2.1 ± 0.5        | 4.9 × 10 <sup>-5</sup>                              | 8 ↓                           | 2.4 × 10 <sup>-5</sup> |
| dTTP                                   | 0.0006 ± 0.0001          | 6 ± 3            | 1.0 × 10 <sup>-4</sup>                              | 2 ↓                           | 4.9 × 10 <sup>-5</sup> |
| <i>21-19/50mer (10-nucleotide gap)</i> |                          |                  |                                                     |                               |                        |
| dGTP                                   | 0.27 ± 0.01              | 2.4 ± 0.3        | 1.1 × 10 <sup>-1</sup>                              | 16 ↓                          |                        |
| dCTP                                   | 0.00019 ± 0.00001        | 5 ± 1            | 3.8 × 10 <sup>-5</sup>                              | 19 ↓                          | 3.4 × 10 <sup>-4</sup> |
| dATP                                   | No incorporation         |                  |                                                     |                               |                        |
| dTTP                                   | No incorporation         |                  |                                                     |                               |                        |
| <i>21/41mer (no gap)</i>               |                          |                  |                                                     |                               |                        |
| dGTP                                   | 0.109 ± 0.007            | 1.7 ± 0.3        | 6.4 × 10 <sup>-2</sup>                              | 28 ↓                          |                        |
| dCTP                                   | 0.00030 ± 0.00002        | 4.2 ± 0.7        | 7.1 × 10 <sup>-5</sup>                              | 10 ↓                          | 1.1 × 10 <sup>-3</sup> |
| dATP                                   | No incorporation         |                  |                                                     |                               |                        |
| dTTP                                   | No incorporation         |                  |                                                     |                               |                        |

<sup>a</sup>An upward-pointing arrow (↑) indicates the ratio was calculated as  $(k_p/K_d)_{\geq 2\text{-nucleotide gap}}/(k_p/K_d)_{1\text{-nucleotide gap}}$ ; a downward-pointing arrow (↓) indicates the calculation used a reciprocal of the equation as follows:  $(k_p/K_d)_{1\text{-nucleotide gap}}/(k_p/K_d)_{\geq 2\text{-nucleotide gap}}$ .

<sup>b</sup>Calculated as  $(k_p/K_d)_{\text{incorrect}}/[(k_p/K_d)_{\text{correct}} + (k_p/K_d)_{\text{incorrect}}]$ .

**Supplementary Table 2.** Kinetic parameters for nucleotide incorporation into gapped or recessed DNA catalyzed by tPol  $\lambda$  at 37 °C.

| dNTP                                               | $k_p$ (s <sup>-1</sup> ) | $K_d$ ( $\mu$ M) | $k_p/K_d$ ( $\mu$ M <sup>-1</sup> s <sup>-1</sup> ) | Efficiency ratio <sup>a</sup> | Fidelity <sup>b</sup>  |
|----------------------------------------------------|--------------------------|------------------|-----------------------------------------------------|-------------------------------|------------------------|
| <i>21-19/41mer (1-nucleotide gap)</i> <sup>c</sup> |                          |                  |                                                     |                               |                        |
| dGTP                                               | 4.1 ± 0.2                | 1.9 ± 0.4        | 2.2                                                 | -                             |                        |
| dCTP                                               | 0.0098 ± 0.0002          | 1.5 ± 0.2        | 6.5 × 10 <sup>-3</sup>                              | -                             | 3.0 × 10 <sup>-3</sup> |
| dATP                                               | 0.0046 ± 0.0001          | 1.4 ± 0.3        | 3.3 × 10 <sup>-3</sup>                              | -                             | 1.5 × 10 <sup>-3</sup> |
| dTTP                                               | 0.0065 ± 0.0001          | 4.7 ± 0.5        | 1.4 × 10 <sup>-3</sup>                              | -                             | 6.4 × 10 <sup>-4</sup> |
| <i>21-19/42mer (2-nucleotide gap)</i>              |                          |                  |                                                     |                               |                        |
| dGTP                                               | 3.7 ± 0.2                | 2.3 ± 0.3        | 1.6                                                 | 1                             |                        |
| dCTP                                               | 0.081 ± 0.001            | 1.12 ± 0.07      | 7.2 × 10 <sup>-2</sup>                              | 11 ↑                          | 4.3 × 10 <sup>-2</sup> |
| dATP                                               | 0.0019 ± 0.0002          | 2.4 ± 0.6        | 7.9 × 10 <sup>-4</sup>                              | 4 ↓                           | 4.9 × 10 <sup>-4</sup> |
| dTTP                                               | 0.0030 ± 0.0009          | 6 ± 3            | 5.0 × 10 <sup>-4</sup>                              | 3 ↓                           | 3.1 × 10 <sup>-4</sup> |
| <i>21-19/45mer (5-nucleotide gap)</i>              |                          |                  |                                                     |                               |                        |
| dGTP                                               | 5.1 ± 0.2                | 3.3 ± 0.4        | 1.5                                                 | 1                             |                        |
| dCTP                                               | 0.0123 ± 0.0003          | 1.4 ± 0.1        | 8.8 × 10 <sup>-3</sup>                              | 1                             | 5.7 × 10 <sup>-3</sup> |
| dATP                                               | 0.0011 ± 0.0002          | 2 ± 1            | 5.5 × 10 <sup>-4</sup>                              | 6 ↓                           | 3.6 × 10 <sup>-4</sup> |
| dTTP                                               | 0.006 ± 0.002            | 9 ± 4            | 6.7 × 10 <sup>-4</sup>                              | 2 ↓                           | 4.3 × 10 <sup>-4</sup> |
| <i>21-19/47mer (7-nucleotide gap)</i>              |                          |                  |                                                     |                               |                        |
| dGTP                                               | 3.78 ± 0.08              | 2.5 ± 0.2        | 1.5                                                 | 1                             |                        |
| dCTP                                               | 0.028 ± 0.002            | 3.5 ± 0.8        | 8.0 × 10 <sup>-3</sup>                              | 1                             | 5.3 × 10 <sup>-3</sup> |
| dATP                                               | 0.00035 ± 0.00002        | 1.6 ± 0.4        | 2.2 × 10 <sup>-4</sup>                              | 15 ↓                          | 1.4 × 10 <sup>-4</sup> |
| dTTP                                               | 0.0027 ± 0.0002          | 11 ± 2           | 2.5 × 10 <sup>-4</sup>                              | 6 ↓                           | 1.6 × 10 <sup>-4</sup> |
| <i>21-19/50mer (10-nucleotide gap)</i>             |                          |                  |                                                     |                               |                        |
| dGTP                                               | 1.43 ± 0.05              | 5.1 ± 0.4        | 2.8 × 10 <sup>-1</sup>                              | 8 ↓                           |                        |
| dCTP                                               | 0.00067 ± 0.00006        | 5 ± 1            | 1.3 × 10 <sup>-4</sup>                              | 49 ↓                          | 4.8 × 10 <sup>-4</sup> |
| dATP                                               | 0.000350 ± 0.000009      | 3.6 ± 0.3        | 9.7 × 10 <sup>-5</sup>                              | 34 ↓                          | 3.5 × 10 <sup>-4</sup> |
| dTTP                                               | No incorporation         |                  |                                                     |                               |                        |
| <i>21/41mer (no gap)</i>                           |                          |                  |                                                     |                               |                        |
| dGTP                                               | 0.68 ± 0.02              | 2.0 ± 0.2        | 3.4 × 10 <sup>-1</sup>                              | 6 ↓                           |                        |
| dCTP                                               | 0.0007 ± 0.0001          | 5 ± 2            | 1.4 × 10 <sup>-4</sup>                              | 47 ↓                          | 4.1 × 10 <sup>-4</sup> |
| dATP                                               | No incorporation         |                  |                                                     |                               |                        |
| dTTP                                               | No incorporation         |                  |                                                     |                               |                        |

<sup>a</sup>An upward-pointing arrow (↑) indicates the ratio was calculated as  $(k_p/K_d)_{\geq 2\text{-nucleotide gap}}/(k_p/K_d)_{1\text{-nucleotide gap}}$ ; a downward-pointing arrow (↓) indicates the calculation used a reciprocal of the equation as follows:  $(k_p/K_d)_{1\text{-nucleotide gap}}/(k_p/K_d)_{\geq 2\text{-nucleotide gap}}$ .

<sup>b</sup>Calculated as  $(k_p/K_d)_{\text{incorrect}}/[(k_p/K_d)_{\text{correct}} + (k_p/K_d)_{\text{incorrect}}]$ .

<sup>c</sup>Kinetic parameters are from reference [1].

**Supplementary Table 3.** Kinetic parameters for nucleotide incorporation into gapped DNA catalyzed by Pol  $\lambda$  at 37 °C.

| dNTP                                      | $k_p$ (s <sup>-1</sup> ) | $K_d$ ( $\mu$ M) | $k_p/K_d$ ( $\mu$ M <sup>-1</sup> s <sup>-1</sup> ) | Efficiency ratio <sup>a</sup> | Fidelity <sup>b</sup>         |
|-------------------------------------------|--------------------------|------------------|-----------------------------------------------------|-------------------------------|-------------------------------|
| <i>21-19/41mer (1-nucleotide gap)</i>     |                          |                  |                                                     |                               |                               |
| dGTP                                      | 2.7 $\pm$ 0.1            | 1.9 $\pm$ 0.2    | 1.4                                                 | -                             |                               |
| dCTP                                      | 0.00145 $\pm$ 0.00005    | 1.0 $\pm$ 0.1    | 1.5 $\times$ 10 <sup>-3</sup>                       | -                             | 1.0 $\times$ 10 <sup>-3</sup> |
| dATP                                      | 0.00047 $\pm$ 0.00002    | 0.9 $\pm$ 0.1    | 5.2 $\times$ 10 <sup>-4</sup>                       | -                             | 3.7 $\times$ 10 <sup>-4</sup> |
| dTTP                                      | 0.00135 $\pm$ 0.00009    | 2.9 $\pm$ 0.6    | 4.7 $\times$ 10 <sup>-4</sup>                       | -                             | 3.3 $\times$ 10 <sup>-4</sup> |
| <i>21-19/42mer (2-nucleotide gap)</i>     |                          |                  |                                                     |                               |                               |
| dGTP                                      | 1.77 $\pm$ 0.02          | 1.51 $\pm$ 0.06  | 1.2                                                 | 1                             |                               |
| dCTP                                      | 0.0161 $\pm$ 0.0004      | 0.69 $\pm$ 0.08  | 2.3 $\times$ 10 <sup>-2</sup>                       | 16 $\uparrow$                 | 2.0 $\times$ 10 <sup>-2</sup> |
| dATP                                      | 0.00037 $\pm$ 0.00002    | 1.2 $\pm$ 0.2    | 3.1 $\times$ 10 <sup>-4</sup>                       | 2 $\uparrow$                  | 2.6 $\times$ 10 <sup>-4</sup> |
| dTTP                                      | 0.00070 $\pm$ 0.00003    | 3.8 $\pm$ 0.5    | 1.8 $\times$ 10 <sup>-4</sup>                       | 3 $\uparrow$                  | 1.6 $\times$ 10 <sup>-4</sup> |
| <i>21-19T/42merCGA (2-nucleotide gap)</i> |                          |                  |                                                     |                               |                               |
| dGTP                                      | 2.4 $\pm$ 0.1            | 2.4 $\pm$ 0.4    | 1                                                   | 1                             |                               |
| dCTP                                      | 0.0305 $\pm$ 0.0007      | 0.52 $\pm$ 0.06  | 5.9 $\times$ 10 <sup>-2</sup>                       | 40 $\uparrow$                 | 5.5 $\times$ 10 <sup>-2</sup> |
| dATP                                      | 0.00069 $\pm$ 0.00003    | 0.6 $\pm$ 0.1    | 1.2 $\times$ 10 <sup>-3</sup>                       | 2 $\uparrow$                  | 1.1 $\times$ 10 <sup>-3</sup> |
| dTTP                                      | 0.00075 $\pm$ 0.00004    | 3.3 $\pm$ 0.7    | 2.3 $\times$ 10 <sup>-4</sup>                       | 2 $\downarrow$                | 2.3 $\times$ 10 <sup>-4</sup> |
| <i>21-19/42merCAG (2-nucleotide gap)</i>  |                          |                  |                                                     |                               |                               |
| dGTP                                      | 2.9 $\pm$ 0.1            | 1.7 $\pm$ 0.3    | 1.7                                                 | 1                             |                               |
| dCTP                                      | 0.00076 $\pm$ 0.00007    | 1.7 $\pm$ 0.5    | 4.5 $\times$ 10 <sup>-4</sup>                       | 3 $\downarrow$                | 2.6 $\times$ 10 <sup>-4</sup> |
| dATP                                      | 0.00049 $\pm$ 0.00002    | 0.9 $\pm$ 0.2    | 5.4 $\times$ 10 <sup>-4</sup>                       | 1                             | 3.2 $\times$ 10 <sup>-4</sup> |
| dTTP                                      | 0.0025 $\pm$ 0.0002      | 4.4 $\pm$ 0.8    | 5.7 $\times$ 10 <sup>-4</sup>                       | 1                             | 3.3 $\times$ 10 <sup>-4</sup> |
| <i>21-19/47mer (7-nucleotide gap)</i>     |                          |                  |                                                     |                               |                               |
| dGTP                                      | 1.86 $\pm$ 0.04          | 1.2 $\pm$ 0.1    | 1.6                                                 | 1                             |                               |
| dCTP                                      | 0.049 $\pm$ 0.001        | 0.9 $\pm$ 0.1    | 5.4 $\times$ 10 <sup>-2</sup>                       | 38 $\uparrow$                 | 3.4 $\times$ 10 <sup>-2</sup> |
| dATP                                      | 0.00066 $\pm$ 0.00001    | 0.24 $\pm$ 0.02  | 2.8 $\times$ 10 <sup>-3</sup>                       | 5 $\uparrow$                  | 1.8 $\times$ 10 <sup>-3</sup> |
| dTTP                                      | 0.0051 $\pm$ 0.0002      | 1.1 $\pm$ 0.2    | 4.6 $\times$ 10 <sup>-3</sup>                       | 10 $\uparrow$                 | 3.0 $\times$ 10 <sup>-3</sup> |
| <i>21-19/47merCAT (7-nucleotide gap)</i>  |                          |                  |                                                     |                               |                               |
| dGTP                                      | 3.3 $\pm$ 0.2            | 3.1 $\pm$ 0.6    | 1.1                                                 | 1                             |                               |
| dCTP                                      | 0.0087 $\pm$ 0.0001      | 0.58 $\pm$ 0.03  | 1.5 $\times$ 10 <sup>-2</sup>                       | 10 $\uparrow$                 | 1.4 $\times$ 10 <sup>-2</sup> |
| dATP                                      | 0.0045 $\pm$ 0.0001      | 1.2 $\pm$ 0.1    | 3.8 $\times$ 10 <sup>-3</sup>                       | 7 $\uparrow$                  | 3.5 $\times$ 10 <sup>-3</sup> |
| dTTP                                      | 0.146 $\pm$ 0.002        | 2.5 $\pm$ 0.1    | 5.8 $\times$ 10 <sup>-2</sup>                       | 125 $\uparrow$                | 5.2 $\times$ 10 <sup>-2</sup> |

<sup>a</sup> An upward-pointing arrow ( $\uparrow$ ) indicates the ratio was calculated as  $(k_p/K_d)_{\geq 2\text{-nucleotide gap}}/(k_p/K_d)_{1\text{-nucleotide gap}}$ ; a downward-pointing arrow ( $\downarrow$ ) indicates the calculation used a reciprocal of the equation as follows:  $(k_p/K_d)_{1\text{-nucleotide gap}}/(k_p/K_d)_{\geq 2\text{-nucleotide gap}}$ .

<sup>b</sup> Calculated as  $(k_p/K_d)_{\text{incorrect}}/[(k_p/K_d)_{\text{correct}} + (k_p/K_d)_{\text{incorrect}}]$ .

**Supplementary Table 4.** Kinetic parameters for nucleotide incorporation into gapped DNA catalyzed by dPol  $\lambda$  at 37 °C.

| dNTP                                      | $k_p$ (s <sup>-1</sup> ) | $K_d$ ( $\mu$ M) | $k_p/K_d$ ( $\mu$ M <sup>-1</sup> s <sup>-1</sup> ) | Efficiency ratio <sup>a</sup> | Fidelity <sup>b</sup>  |
|-------------------------------------------|--------------------------|------------------|-----------------------------------------------------|-------------------------------|------------------------|
| <i>21-19/41mer (1-nucleotide gap)</i>     |                          |                  |                                                     |                               |                        |
| dGTP                                      | 3.1 ± 0.1                | 1.7 ± 0.2        | 1.8                                                 | -                             |                        |
| dCTP                                      | 0.00135 ± 0.00007        | 1.9 ± 0.4        | 7.1 × 10 <sup>-4</sup>                              | -                             | 3.9 × 10 <sup>-4</sup> |
| dATP                                      | 0.00066 ± 0.00007        | 1.8 ± 0.7        | 3.7 × 10 <sup>-4</sup>                              | -                             | 2.0 × 10 <sup>-4</sup> |
| dTTP                                      | 0.00130 ± 0.00009        | 7 ± 1            | 1.9 × 10 <sup>-4</sup>                              | -                             | 1.0 × 10 <sup>-4</sup> |
| <i>21-19/42mer (2-nucleotide gap)</i>     |                          |                  |                                                     |                               |                        |
| dGTP                                      | 2.80 ± 0.05              | 1.24 ± 0.09      | 2.3                                                 | 1                             |                        |
| dCTP                                      | 0.0208 ± 0.0005          | 0.85 ± 0.09      | 2.4 × 10 <sup>-2</sup>                              | 34 ↑                          | 1.1 × 10 <sup>-2</sup> |
| dATP                                      | 0.00031 ± 0.00002        | 3.0 ± 0.6        | 1.0 × 10 <sup>-4</sup>                              | 4 ↓                           | 4.6 × 10 <sup>-5</sup> |
| dTTP                                      | 0.00070 ± 0.00004        | 4.6 ± 0.7        | 1.5 × 10 <sup>-4</sup>                              | 1                             | 6.7 × 10 <sup>-5</sup> |
| <i>21-19T/42merCGA (2-nucleotide gap)</i> |                          |                  |                                                     |                               |                        |
| dGTP                                      | 2.57 ± 0.08              | 0.9 ± 0.1        | 2.9                                                 | 1                             |                        |
| dCTP                                      | 0.0200 ± 0.0006          | 0.80 ± 0.07      | 2.5 × 10 <sup>-2</sup>                              | 35 ↑                          | 8.7 × 10 <sup>-3</sup> |
| dATP                                      | 0.00027 ± 0.00002        | 1.3 ± 0.4        | 2.1 × 10 <sup>-4</sup>                              | 2 ↓                           | 7.3 × 10 <sup>-5</sup> |
| dTTP                                      | 0.00024 ± 0.00002        | 3.3 ± 0.8        | 7.3 × 10 <sup>-5</sup>                              | 3 ↓                           | 2.5 × 10 <sup>-5</sup> |
| <i>21-19/42merCAG (2-nucleotide gap)</i>  |                          |                  |                                                     |                               |                        |
| dGTP                                      | 3.9 ± 0.2                | 1.6 ± 0.3        | 2.4                                                 | 1                             |                        |
| dCTP                                      | 0.00116 ± 0.00008        | 2.3 ± 0.5        | 5.0 × 10 <sup>-4</sup>                              | 1                             | 2.1 × 10 <sup>-4</sup> |
| dATP                                      | 0.00030 ± 0.00003        | 2.5 ± 0.8        | 1.2 × 10 <sup>-4</sup>                              | 3 ↓                           | 4.9 × 10 <sup>-5</sup> |
| dTTP                                      | 0.0027 ± 0.0002          | 4.0 ± 0.9        | 6.8 × 10 <sup>-4</sup>                              | 4 ↑                           | 2.8 × 10 <sup>-4</sup> |

<sup>a</sup>An upward-pointing arrow (↑) indicates the ratio was calculated as  $(k_p/K_d)_{\geq 2\text{-nucleotide gap}}/(k_p/K_d)_{1\text{-nucleotide gap}}$ ; a downward-pointing arrow (↓) indicates the calculation used a reciprocal of the equation as follows:  $(k_p/K_d)_{1\text{-nucleotide gap}}/(k_p/K_d)_{\geq 2\text{-nucleotide gap}}$ .

<sup>b</sup>Calculated as  $(k_p/K_d)_{\text{incorrect}}/[(k_p/K_d)_{\text{correct}} + (k_p/K_d)_{\text{incorrect}}]$ .

**Supplementary Table 5.** Kinetic parameters for nucleotide incorporation into gapped DNA catalyzed by tPol  $\lambda$  at 37 °C.

| dNTP                                               | $k_p$ (s <sup>-1</sup> ) | $K_d$ ( $\mu$ M) | $k_p/K_d$ ( $\mu$ M <sup>-1</sup> s <sup>-1</sup> ) | Efficiency ratio <sup>a</sup> | Fidelity <sup>b</sup> |
|----------------------------------------------------|--------------------------|------------------|-----------------------------------------------------|-------------------------------|-----------------------|
| <i>21-19/41mer (1-nucleotide gap)</i> <sup>c</sup> |                          |                  |                                                     |                               |                       |
| dGTP                                               | 4.1 $\pm$ 0.2            | 1.9 $\pm$ 0.4    | 2.2                                                 | -                             |                       |
| dCTP                                               | 0.0098 $\pm$ 0.0002      | 1.5 $\pm$ 0.2    | 6.5 $\times 10^{-3}$                                | -                             | 3.0 $\times 10^{-3}$  |
| dATP                                               | 0.0046 $\pm$ 0.0001      | 1.4 $\pm$ 0.3    | 3.3 $\times 10^{-3}$                                | -                             | 1.5 $\times 10^{-3}$  |
| dTTP                                               | 0.0065 $\pm$ 0.0001      | 4.7 $\pm$ 0.5    | 1.4 $\times 10^{-3}$                                | -                             | 6.4 $\times 10^{-4}$  |
| <i>21-19T/42mer (2-nucleotide gap)</i>             |                          |                  |                                                     |                               |                       |
| dGTP                                               | 3.7 $\pm$ 0.2            | 2.3 $\pm$ 0.3    | 1.6                                                 | 1                             |                       |
| dCTP                                               | 0.081 $\pm$ 0.001        | 1.12 $\pm$ 0.07  | 7.2 $\times 10^{-2}$                                | 11 $\uparrow$                 | 4.3 $\times 10^{-2}$  |
| dATP                                               | 0.0019 $\pm$ 0.0002      | 2.4 $\pm$ 0.6    | 7.9 $\times 10^{-4}$                                | 4 $\downarrow$                | 4.9 $\times 10^{-4}$  |
| dTTP                                               | 0.0030 $\pm$ 0.0009      | 6 $\pm$ 3        | 5.0 $\times 10^{-4}$                                | 3 $\downarrow$                | 3.1 $\times 10^{-4}$  |
| <i>21-19/42merCGA (2-nucleotide gap)</i>           |                          |                  |                                                     |                               |                       |
| dGTP                                               | 4.8 $\pm$ 0.1            | 2.1 $\pm$ 0.2    | 2.3                                                 | 1                             |                       |
| dCTP                                               | 0.141 $\pm$ 0.003        | 0.78 $\pm$ 0.06  | 1.8 $\times 10^{-1}$                                | 28 $\uparrow$                 | 7.3 $\times 10^{-2}$  |
| dATP                                               | 0.0014 $\pm$ 0.0001      | 1.3 $\pm$ 0.3    | 1.1 $\times 10^{-3}$                                | 3 $\downarrow$                | 4.7 $\times 10^{-4}$  |
| dTTP                                               | 0.0028 $\pm$ 0.0002      | 5 $\pm$ 2        | 5.6 $\times 10^{-4}$                                | 2 $\downarrow$                | 2.4 $\times 10^{-4}$  |
| <i>21-19/42merCAG (2-nucleotide gap)</i>           |                          |                  |                                                     |                               |                       |
| dGTP                                               | 4.6 $\pm$ 0.2            | 2.6 $\pm$ 0.4    | 1.8                                                 | 1                             |                       |
| dCTP                                               | 0.0064 $\pm$ 0.0003      | 1.3 $\pm$ 0.2    | 4.9 $\times 10^{-3}$                                | 1                             | 2.8 $\times 10^{-3}$  |
| dATP                                               | 0.002 $\pm$ 0.0001       | 1.3 $\pm$ 0.3    | 1.5 $\times 10^{-3}$                                | 2 $\downarrow$                | 8.7 $\times 10^{-4}$  |
| dTTP                                               | 0.016 $\pm$ 0.001        | 4.3 $\pm$ 0.9    | 3.7 $\times 10^{-3}$                                | 3 $\uparrow$                  | 2.1 $\times 10^{-3}$  |

<sup>a</sup>An upward-pointing arrow ( $\uparrow$ ) indicates the ratio was calculated as  $(k_p/K_d)_{\geq 2\text{-nucleotide gap}}/(k_p/K_d)_{1\text{-nucleotide gap}}$ ; a downward-pointing arrow ( $\downarrow$ ) indicates the calculation used a reciprocal of the equation as follows:  $(k_p/K_d)_{1\text{-nucleotide gap}}/(k_p/K_d)_{\geq 2\text{-nucleotide gap}}$ .

<sup>b</sup>Calculated as  $(k_p/K_d)_{\text{incorrect}}/[(k_p/K_d)_{\text{correct}} + (k_p/K_d)_{\text{incorrect}}]$ .

<sup>c</sup>Kinetic parameters are from Reference [1].

**Supplementary Table 6.** Kinetic parameters for nucleotide incorporation into gapped DNA catalyzed by Pol  $\beta$  at 37 °C.

| dNTP                                      | $k_p$ (s <sup>-1</sup> ) | $K_d$ ( $\mu$ M) | $k_p/K_d$ ( $\mu$ M <sup>-1</sup> s <sup>-1</sup> ) | Efficiency ratio <sup>a</sup> | Fidelity <sup>b</sup>  |
|-------------------------------------------|--------------------------|------------------|-----------------------------------------------------|-------------------------------|------------------------|
| <i>21-19/41mer (1-nucleotide gap)</i>     |                          |                  |                                                     |                               |                        |
| dGTP                                      | 18.8 ± 0.4               | 8.7 ± 0.4        | 2.2                                                 | -                             |                        |
| dCTP                                      | 0.059 ± 0.002            | 140 ± 20         | 4.2 × 10 <sup>-4</sup>                              | -                             | 1.9 × 10 <sup>-4</sup> |
| dATP                                      | 0.32 ± 0.02              | 280 ± 60         | 1.1 × 10 <sup>-3</sup>                              | -                             | 5.3 × 10 <sup>-4</sup> |
| dTTP                                      | 0.27 ± 0.01              | 330 ± 40         | 8.2 × 10 <sup>-4</sup>                              | -                             | 3.7 × 10 <sup>-4</sup> |
| <i>21-19/42mer (2-nucleotide gap)</i>     |                          |                  |                                                     |                               |                        |
| dGTP                                      | 39 ± 1                   | 12 ± 2           | 3.3                                                 | 1                             |                        |
| dCTP                                      | 0.0153 ± 0.0002          | 34 ± 3           | 4.5 × 10 <sup>-4</sup>                              | 1                             | 1.4 × 10 <sup>-4</sup> |
| dATP                                      | 0.212 ± 0.009            | 200 ± 20         | 1.1 × 10 <sup>-3</sup>                              | 1                             | 3.3 × 10 <sup>-4</sup> |
| dTTP                                      | 0.173 ± 0.009            | 340 ± 50         | 5.1 × 10 <sup>-4</sup>                              | 2 ↓                           | 1.6 × 10 <sup>-4</sup> |
| <i>21-19T/42merCGA (2-nucleotide gap)</i> |                          |                  |                                                     |                               |                        |
| dGTP                                      | 41 ± 4                   | 10 ± 3           | 4.1                                                 | 2 ↑                           |                        |
| dCTP                                      | 0.041 ± 0.006            | 300 ± 100        | 1.4 × 10 <sup>-4</sup>                              | 3 ↓                           | 3.3 × 10 <sup>-5</sup> |
| dATP                                      | 0.094 ± 0.005            | 190 ± 30         | 4.9 × 10 <sup>-4</sup>                              | 2 ↓                           | 1.2 × 10 <sup>-4</sup> |
| dTTP                                      | 0.26 ± 0.07              | 1500 ± 600       | 1.7 × 10 <sup>-4</sup>                              | 5 ↓                           | 4.2 × 10 <sup>-5</sup> |
| <i>21-19/42merCAG (2-nucleotide gap)</i>  |                          |                  |                                                     |                               |                        |
| dGTP                                      | 44 ± 1                   | 10 ± 1           | 4.4                                                 | 2 ↑                           |                        |
| dCTP                                      | 0.072 ± 0.004            | 340 ± 60         | 2.1 × 10 <sup>-4</sup>                              | 2 ↓                           | 4.8 × 10 <sup>-5</sup> |
| dATP                                      | 0.180 ± 0.008            | 140 ± 20         | 1.3 × 10 <sup>-3</sup>                              | 1                             | 2.9 × 10 <sup>-4</sup> |
| dTTP                                      | 0.0103 ± 0.0003          | 17 ± 2           | 6.1 × 10 <sup>-4</sup>                              | 1                             | 1.4 × 10 <sup>-4</sup> |
| <i>21-19/47mer (7-nucleotide gap)</i>     |                          |                  |                                                     |                               |                        |
| dGTP                                      | 37 ± 5                   | 100 ± 30         | 3.7 × 10 <sup>-1</sup>                              | 6 ↓                           |                        |
| dCTP                                      | 0.203 ± 0.006            | 500 ± 40         | 4.1 × 10 <sup>-4</sup>                              | 1                             | 1.1 × 10 <sup>-3</sup> |
| dATP                                      | 0.013 ± 0.002            | 800 ± 300        | 1.6 × 10 <sup>-5</sup>                              | 70 ↓                          | 4.4 × 10 <sup>-5</sup> |
| dTTP                                      | 0.0096 ± 0.0005          | 1400 ± 100       | 6.9 × 10 <sup>-6</sup>                              | 120 ↓                         | 1.9 × 10 <sup>-5</sup> |
| <i>21-19/47merCAT (7-nucleotide gap)</i>  |                          |                  |                                                     |                               |                        |
| dGTP                                      | 32 ± 4                   | 230 ± 60         | 1.4 × 10 <sup>-1</sup>                              | 16 ↓                          |                        |
| dCTP                                      | 0.0116 ± 0.0009          | 1200 ± 200       | 9.7 × 10 <sup>-6</sup>                              | 44 ↓                          | 6.9 × 10 <sup>-5</sup> |
| dATP                                      | 0.04 ± 0.01              | 1300 ± 700       | 3.1 × 10 <sup>-5</sup>                              | 37 ↓                          | 2.2 × 10 <sup>-4</sup> |
| dTTP                                      | 0.0113 ± 0.0003          | 850 ± 40         | 1.3 × 10 <sup>-5</sup>                              | 62 ↓                          | 9.6 × 10 <sup>-5</sup> |

<sup>a</sup>An upward-pointing arrow (↑) indicates the ratio was calculated as  $(k_p/K_d)_{\geq 2\text{-nucleotide gap}}/(k_p/K_d)_{1\text{-nucleotide gap}}$ ; a downward-pointing arrow (↓) indicates the calculation used a reciprocal of the equation as follows:  $(k_p/K_d)_{1\text{-nucleotide gap}}/(k_p/K_d)_{\geq 2\text{-nucleotide gap}}$ .

<sup>b</sup>Calculated as  $(k_p/K_d)_{\text{incorrect}}/[(k_p/K_d)_{\text{correct}} + (k_p/K_d)_{\text{incorrect}}]$ .

Supplementary Figure 1

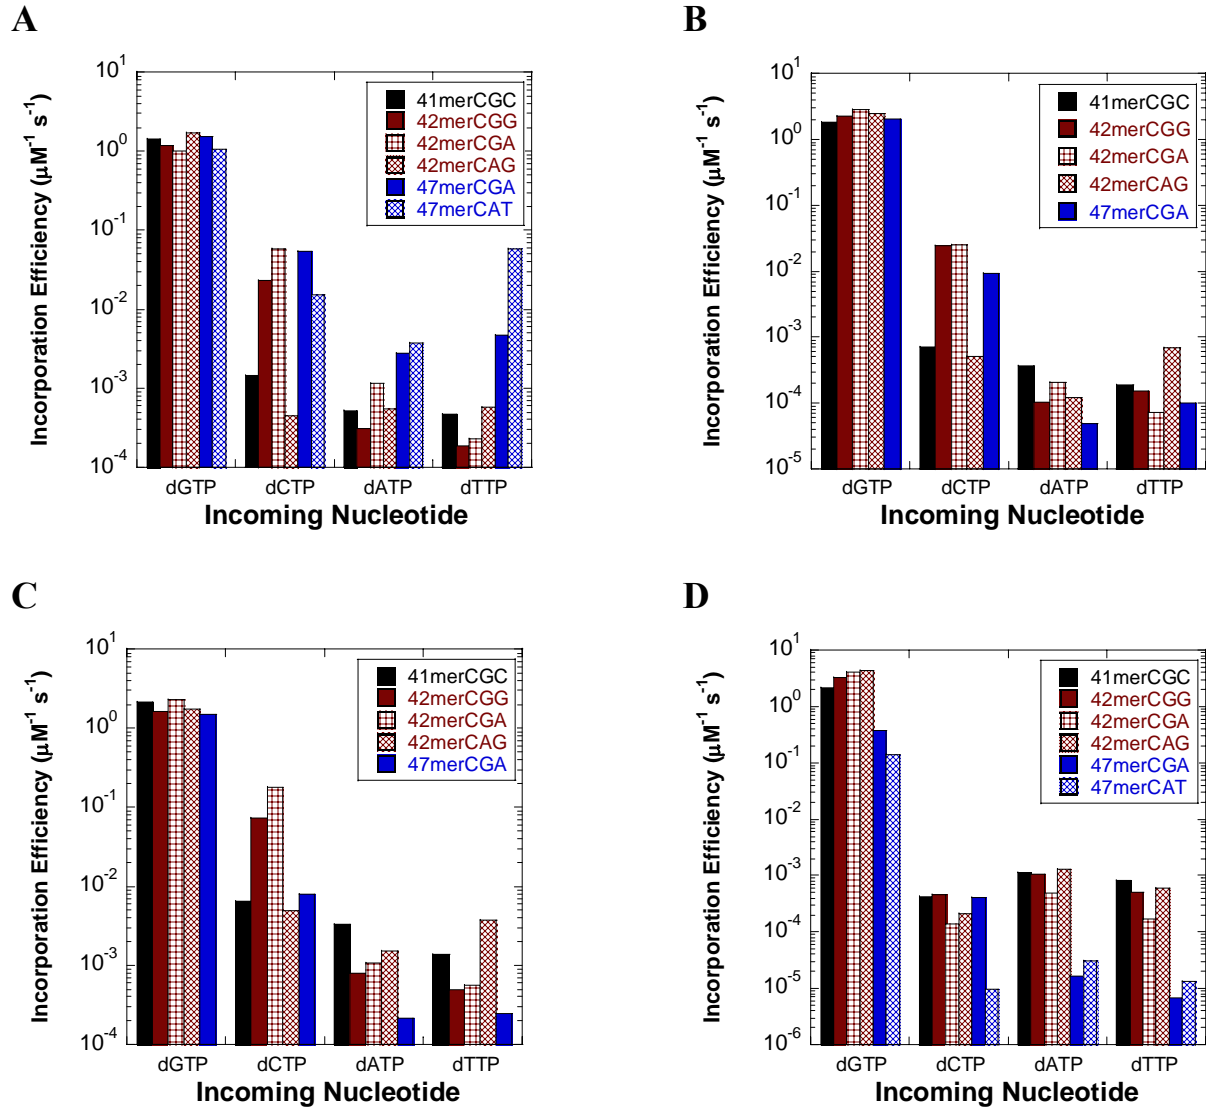

**Supplementary Figure 1. Effect of DNA sequence on polymerization efficiency.**

Incorporation efficiency is plotted for each of the incoming nucleotides for (A) Pol  $\lambda$ , (B) dPol  $\lambda$ , (C) tPol  $\lambda$ , and (D) Pol  $\beta$ . Nucleotide incorporation into the different DNA substrates is represented in the legend as follows: solid black bars for 21-19/41merCGC, solid scarlet bars for 21-19/42merCGG, scarlet grid bars for 21-19T/42merCGA, scarlet criss-cross bars for 21-19/42merCAG, solid blue bars for 21-19/47merCGA, and blue criss-cross bars for 21-19/47merCAT.

## Supplementary Figure 2

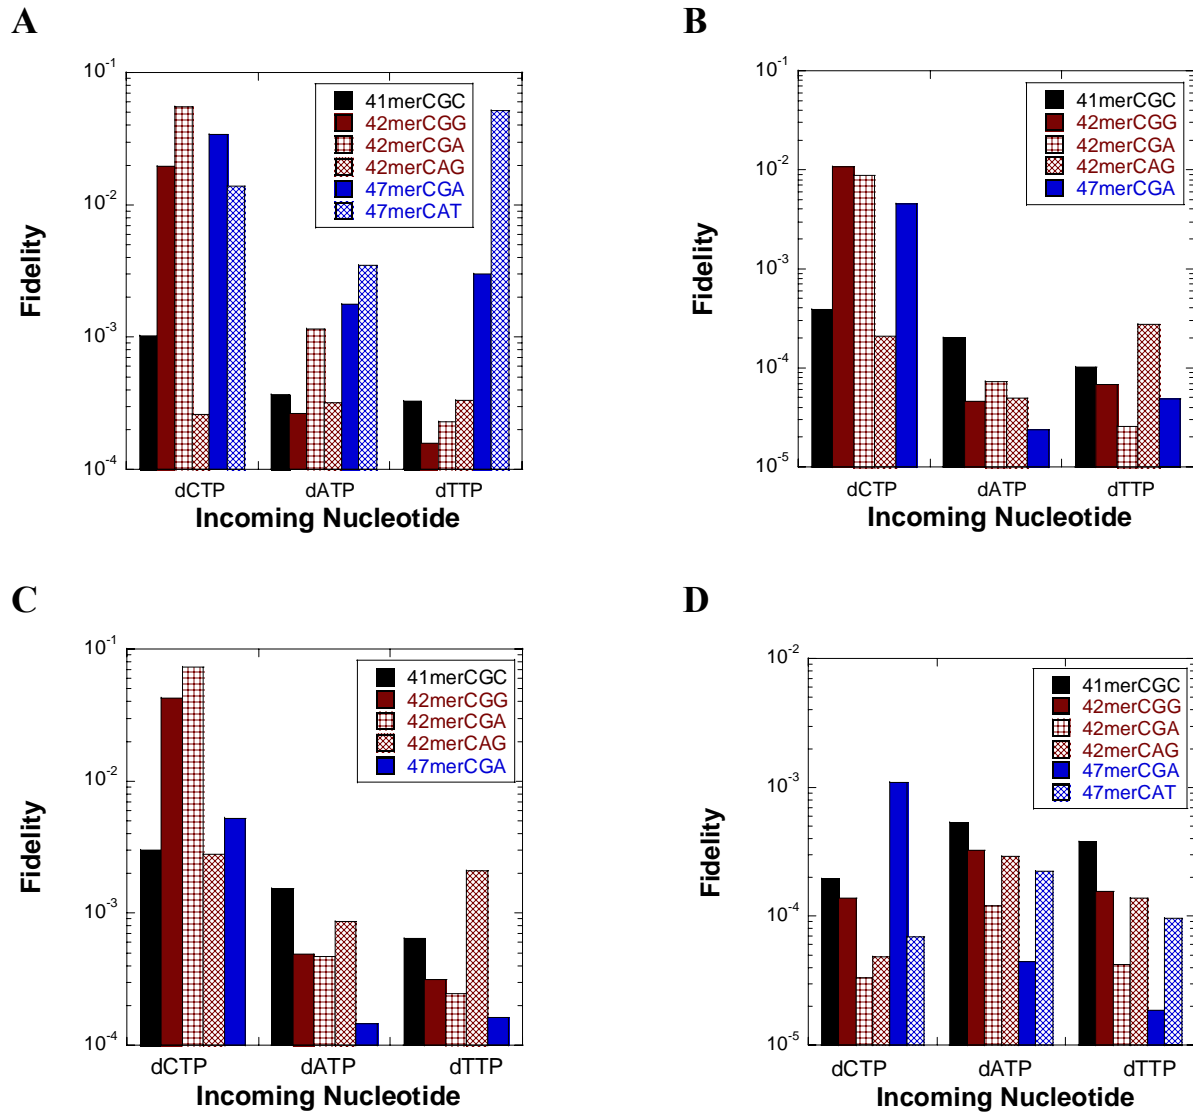

**Supplementary Figure 2. Effect of DNA sequence on polymerization fidelity.** The base substitution fidelity is plotted for each of the incoming nucleotides for (A) Pol  $\lambda$ , (B) dPol  $\lambda$ , (C) tPol  $\lambda$ , and (D) Pol  $\beta$ . The fidelity was calculated as  $(k_p/K_d)_{\text{incorrect}} / [(k_p/K_d)_{\text{correct}} + (k_p/K_d)_{\text{incorrect}}]$ . Nucleotide incorporation into the different DNA substrates is represented in the legend as follows: solid black bars for 21-19/41merCGC, solid scarlet bars for 21-19/42merCGG, scarlet grid bars for 21-19T/42merCGA, scarlet criss-cross bars for 21-19/42merCAG, solid blue bars for 21-19/47merCGA, and blue criss-cross bars for 21-19/47merCAT.



## REFERENCE

1. Fiala, K. A., Abdel-Gawad, W. & Suo, Z. (2004) Pre-steady-state kinetic studies of the fidelity and mechanism of polymerization catalyzed by truncated human DNA polymerase lambda, *Biochemistry*. 43, 6751-62.
